# Supplementary material for: Enhanced microalgal lipid extraction using bio-based solvents for sustainable biofuel production
Source: Royal Society of Chemistry journal article supplement (doi:10.1039/c7gc02735d), 2017-01-01
Supplement: c7gc02735d1.pdf [file c7gc02735d1.pdf]

## ELECTRONIC SUPPLEMENTARY INFORMATION

### Enhanced microalgal lipid extraction using bio-based solvents for sustainable biofuel production

Wan M. Asyraf Wan Mahmood,<sup>a,b</sup> Constantinos Theodoropoulos,<sup>a,b</sup> Maria Gonzalez-Miquel<sup>\*a,b</sup>

<sup>a</sup> School of Chemical Engineering and Analytical Sciences, Faculty of Science and Engineering, The University of Manchester, Manchester M13 9PL, UK

<sup>b</sup> Biochemical and Bioprocess Engineering Group, The University of Manchester, M13 9PL, UK

Table S1. GC-MS FAME spectrum

| FAME  | Label | FAME  | Label |
|-------|-------|-------|-------|
| C14:0 | A     | C18:1 | H     |
| C15:0 | B     | C18:2 | I     |
| C16:0 | C     | C18:3 | J     |
| C16:1 | D     | C20:4 | K     |
| C16:2 | E     | C20:5 | L     |
| C16:3 | F     | C24:0 | M     |
| C18:0 | G     |       |       |

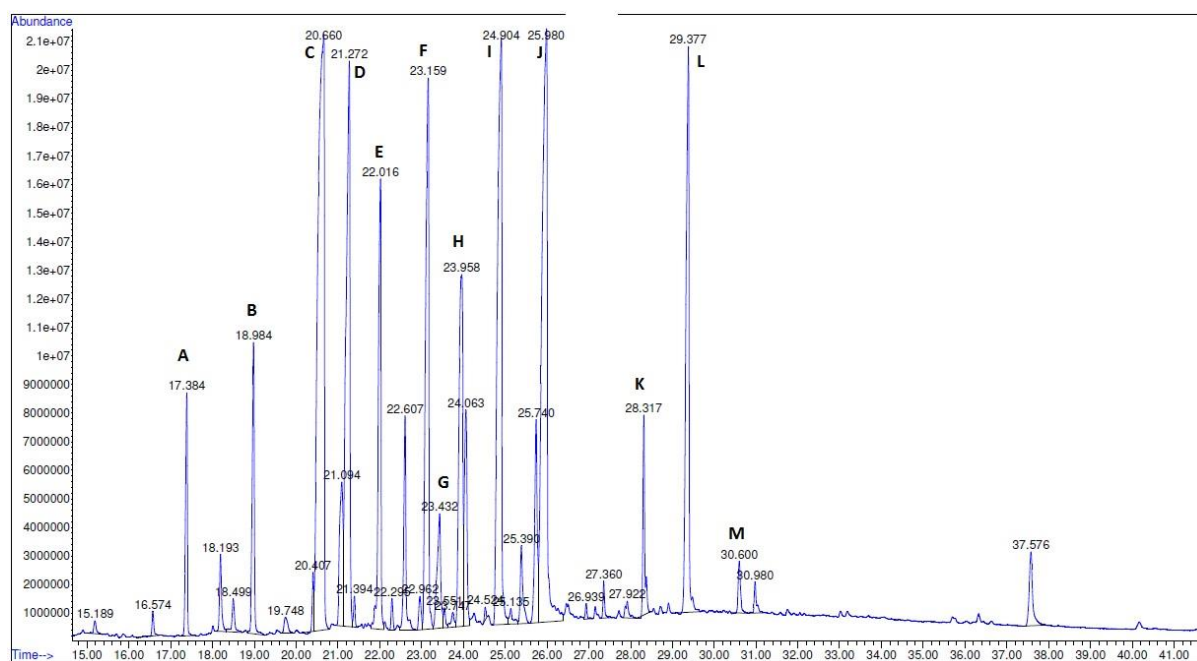

Figure S1. GC-MS chromatogram of FAME produced from *Chlorella vulgaris* (hexane extract)

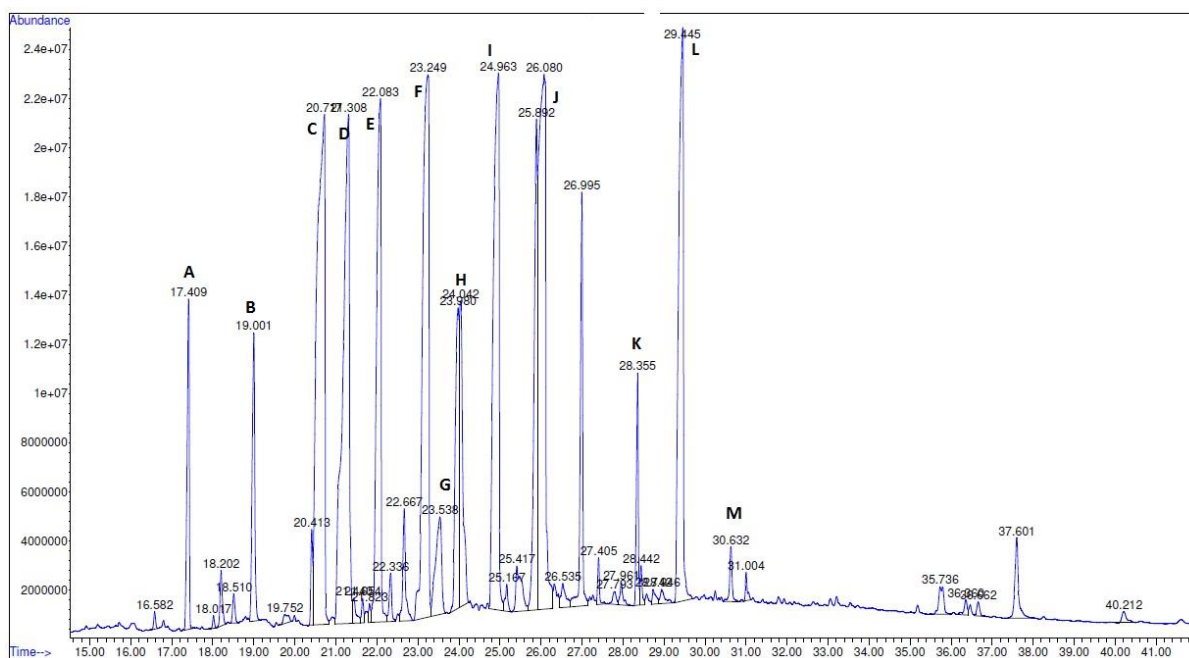

Figure S2. GC-MS chromatogram of FAME produced from *Chlorella vulgaris* (ethyl acetate extract)

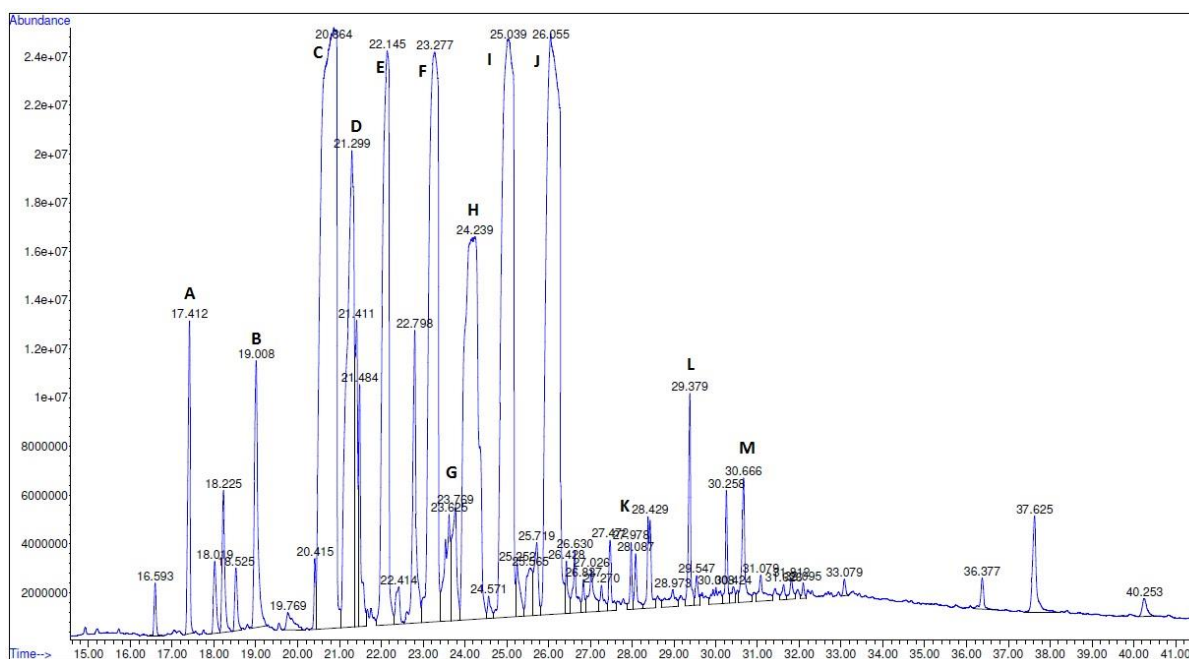

Figure S3. GC-MS chromatogram of FAME produced from *Chlorella vulgaris* (ethyl lactate extract)

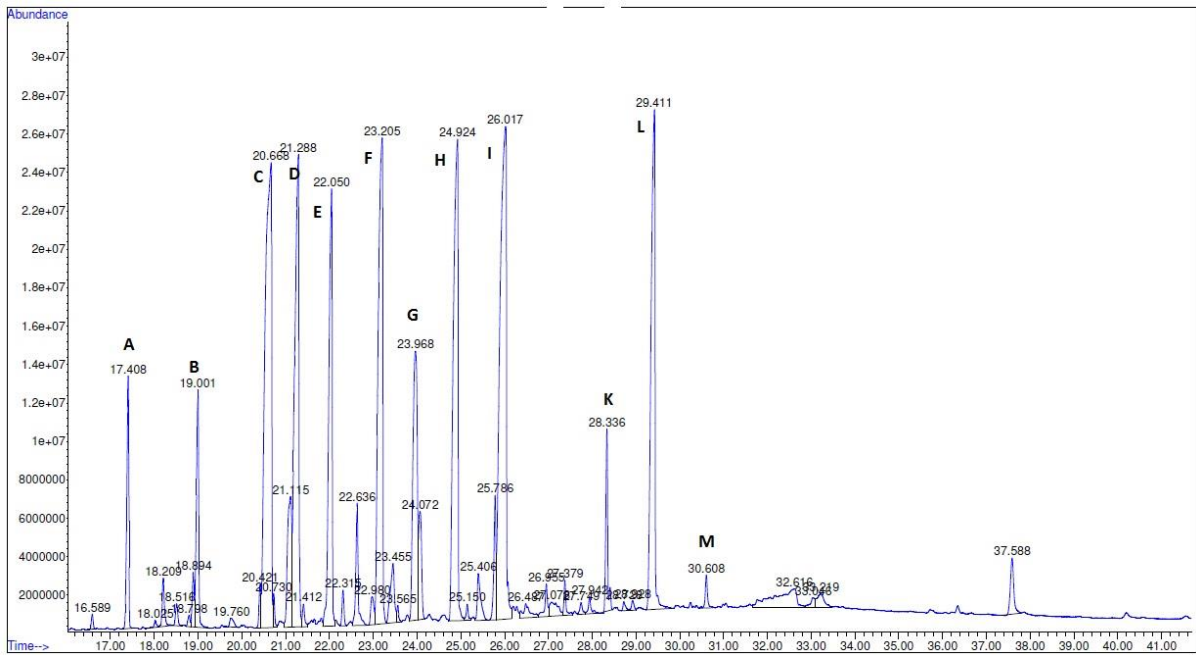

Figure S4. GC-MS chromatogram of FAME produced from *Chlorella vulgaris* (cyclopentyl methyl ether extract)

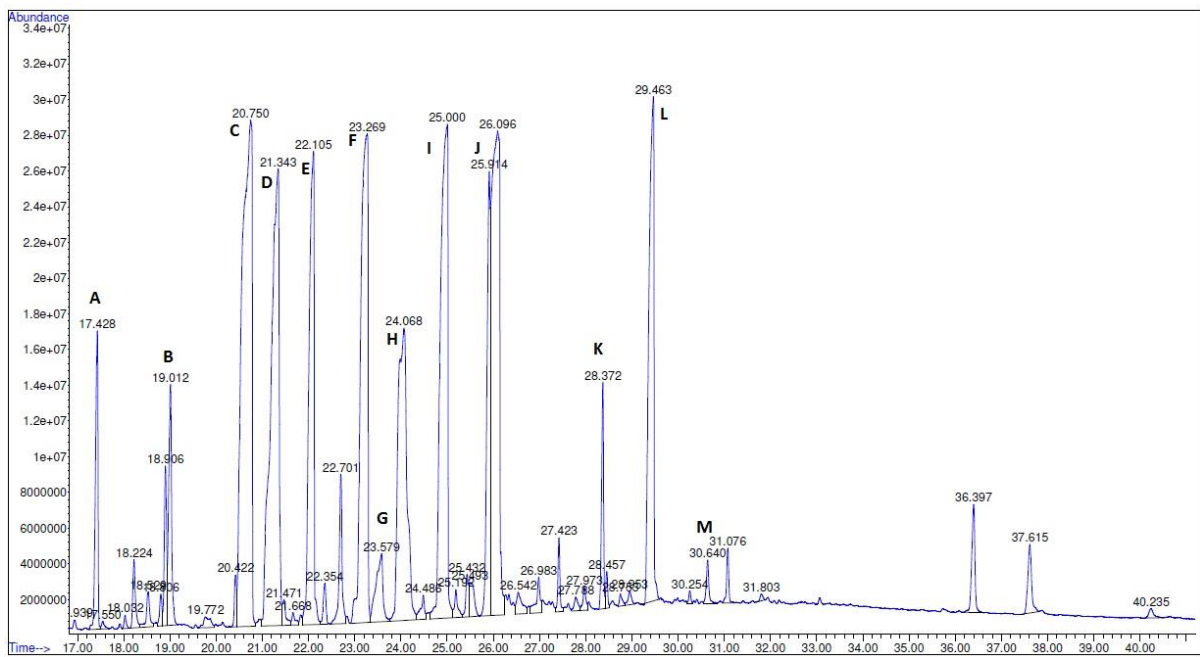

Figure S5. GC-MS chromatogram of FAME produced from *Chlorella vulgaris* (2-methyltetrahydrofuran extract)

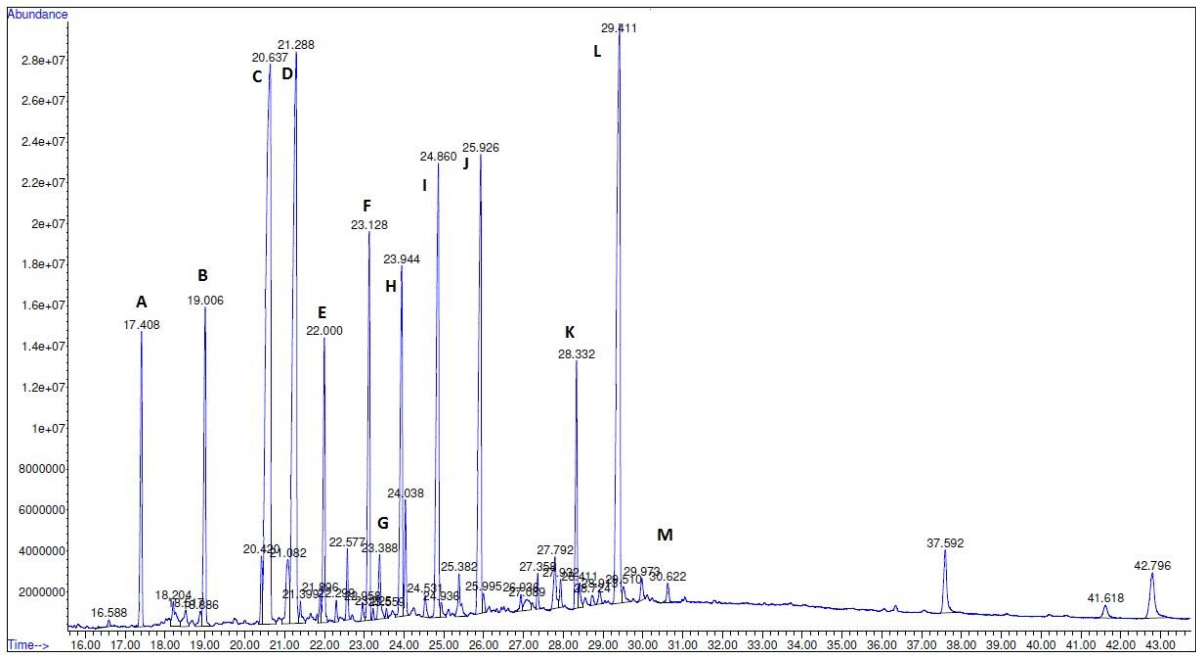

Figure S6. GC-MS chromatogram of FAME produced from *Nannochloropsis sp.* (hexane extract)

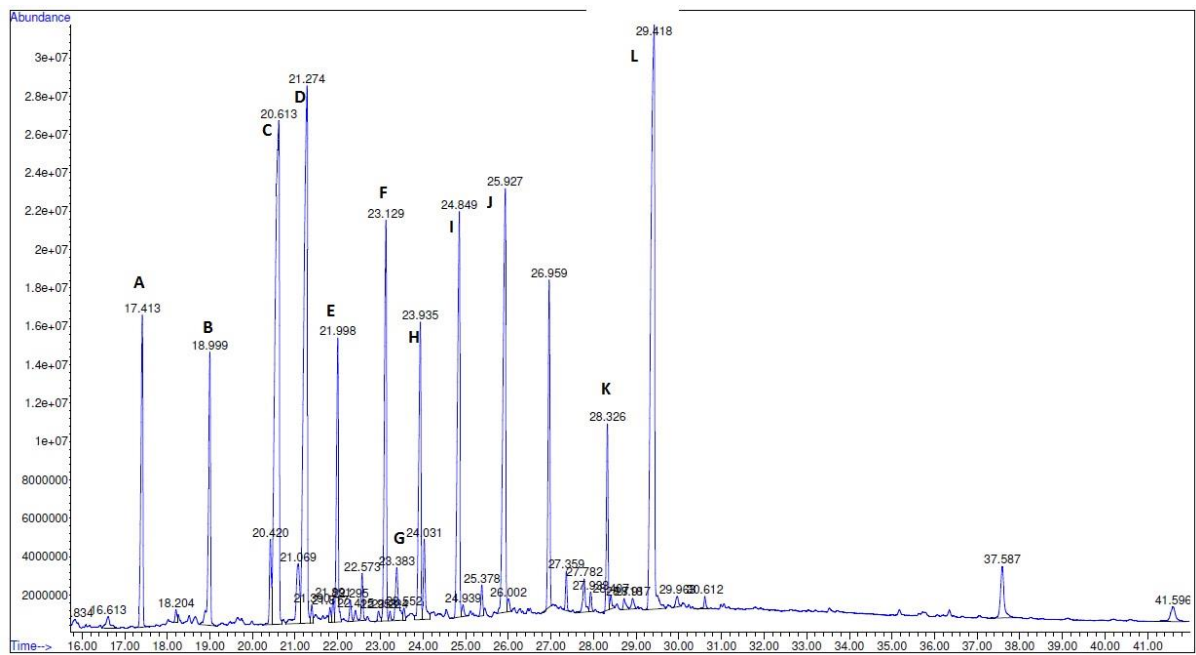

Figure S7. GC-MS chromatogram of FAME produced from *Nannochloropsis sp.* (ethyl acetate extract)

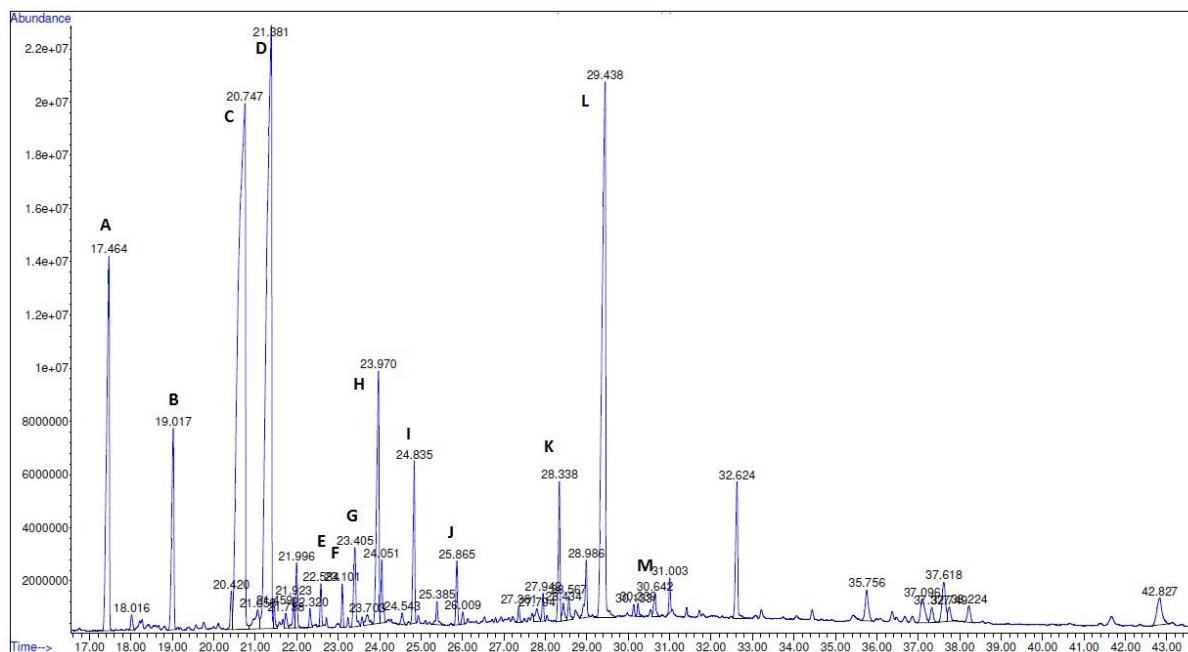

Figure S8. GC-MS chromatogram of FAME produced from *Nannochloropsis sp.* (ethyl lactate extract)

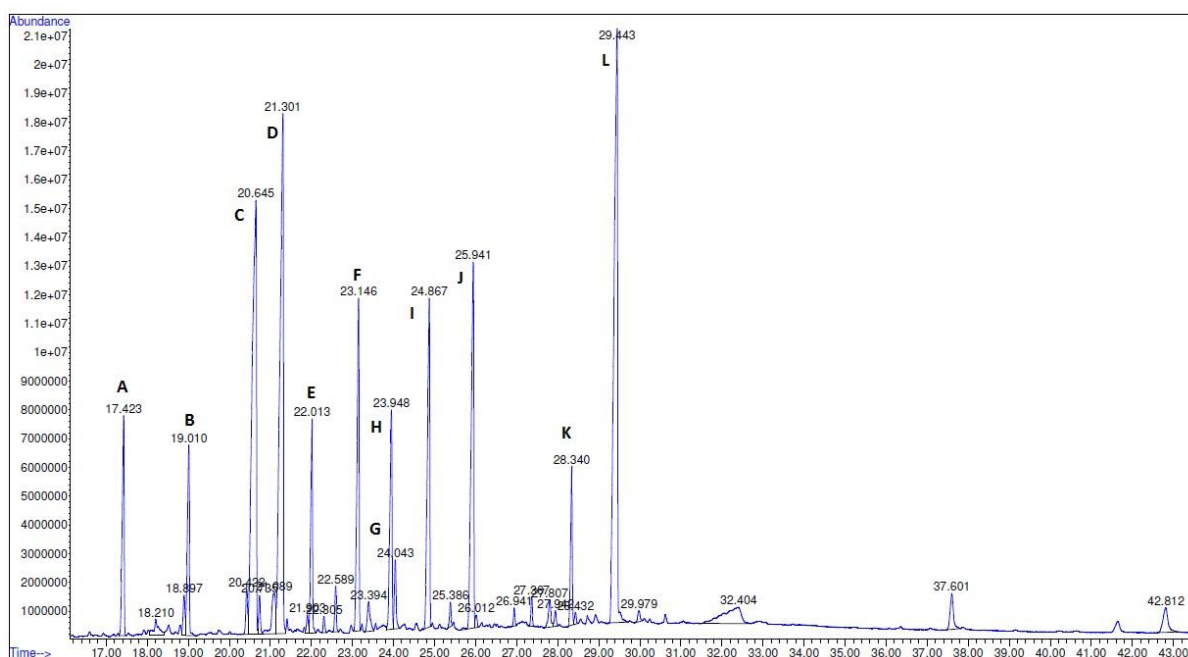

Figure S9. GC-MS chromatogram of FAME produced from *Nannochloropsis sp.* (cyclopentyl methyl ether extract)

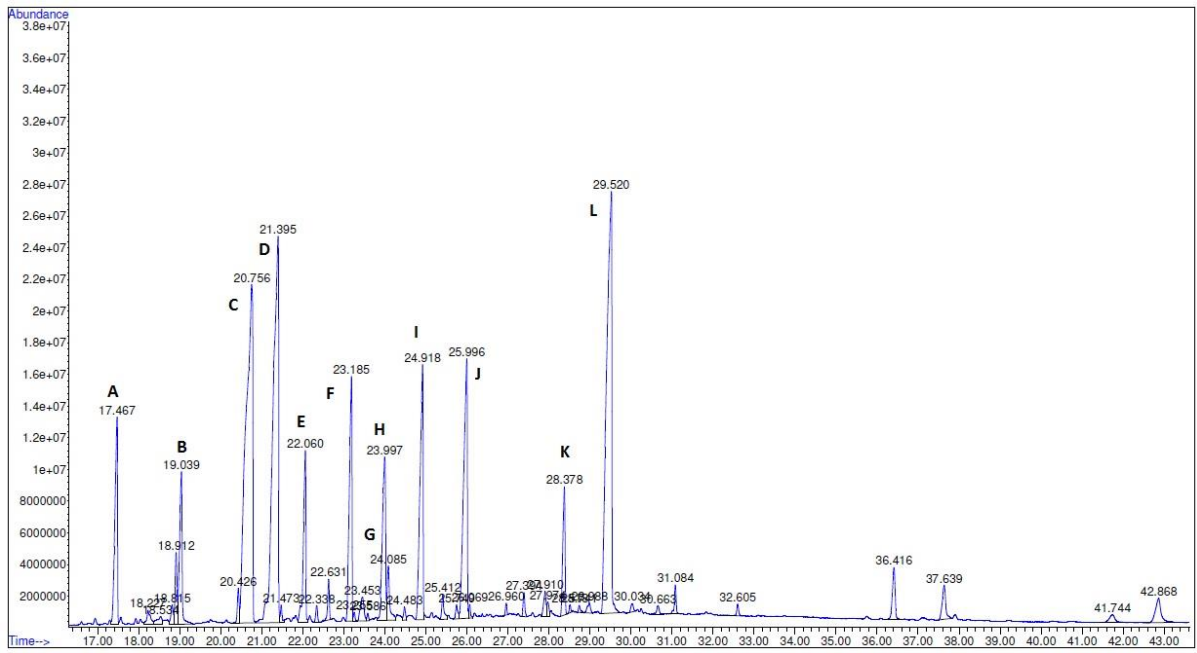

Figure S10. GC-MS chromatogram of FAME produced from *Nannochloropsis sp.* (2-methyltetrahydrofuran extract)
